# Supplementary material for: QUANTA: An Interdisciplinary Learning Community (Four Studies).
Source: Royal Society of Chemistry journal article supplement (doi:10.1039/d2ra08040k), 1992-01-01
Supplement: d2ra08040k1.pdf [file d2ra08040k1.pdf]

*Electronic Supplementary Information*

**An ionic Fe-based metal-organic-framework with 4'-pyridyl-2,2';6',2''-  
terpyridine for catalytic hydroboration of alkynes**

Guoqi Zhang,<sup>a\*</sup> Shengping Zheng<sup>b</sup> and Michelle C. Neary<sup>b</sup>

---

<sup>a</sup> *Department of Sciences, John Jay College and PhD Program in Chemistry, The Graduate Center, The City University of New York, New York, NY 10019, USA. E-mail: guzhang@jjay.cuny.edu.*

<sup>b</sup> *Department of Chemistry, Hunter College, the City University of New York, New York, 10065 NY, USA.*

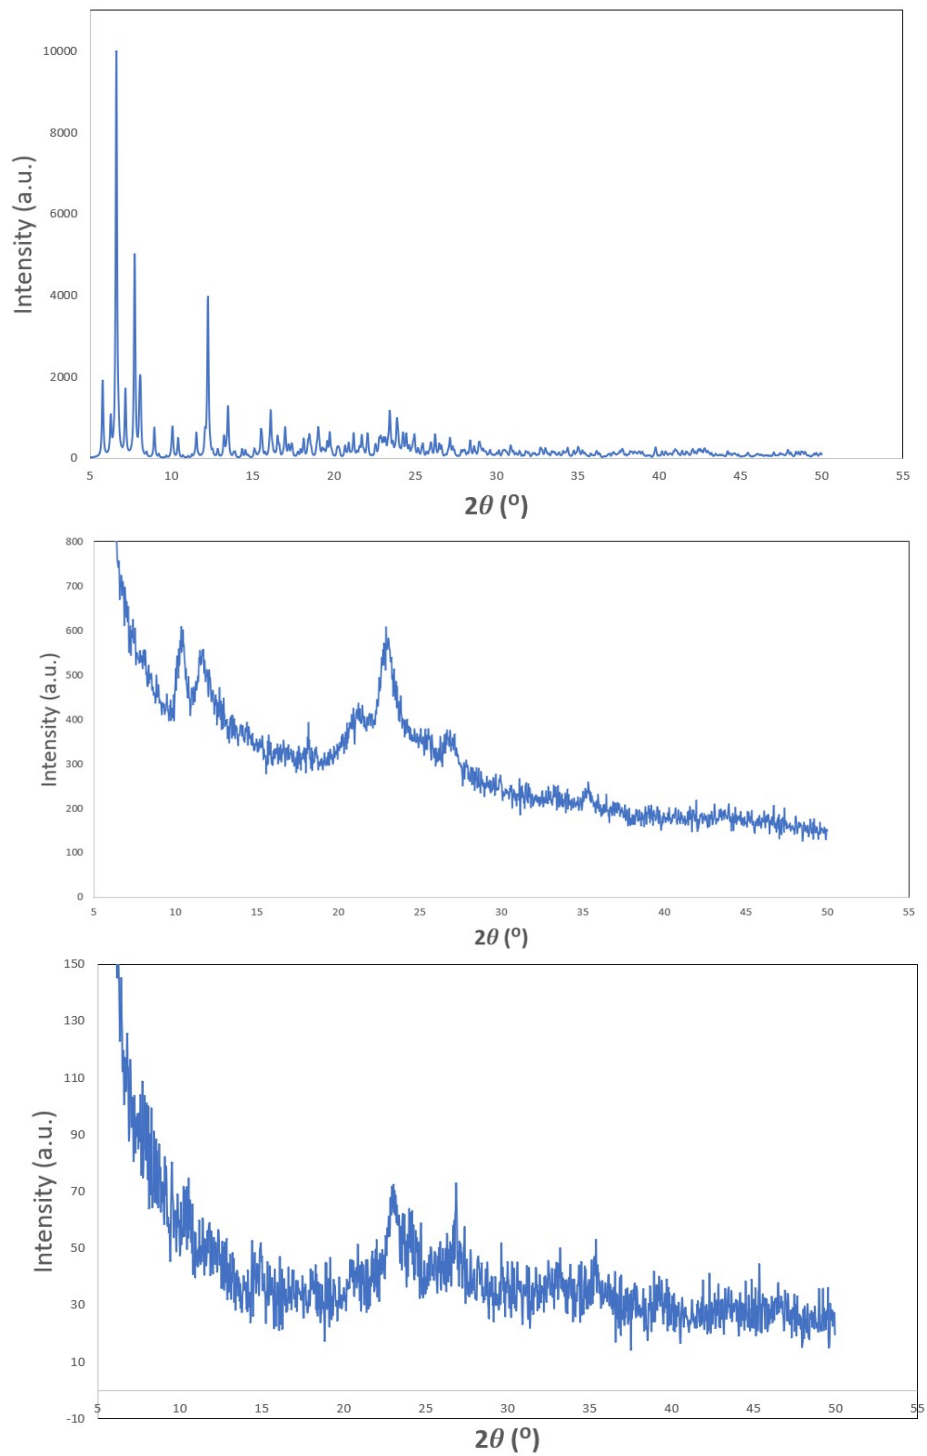

**Figure S1.** The measured PXRD pattern of sample **1** after being dried in the air (green line) and the calculated PXRD pattern of **1** from the single-crystal X-ray diffraction data (violet line).

### Before catalysis

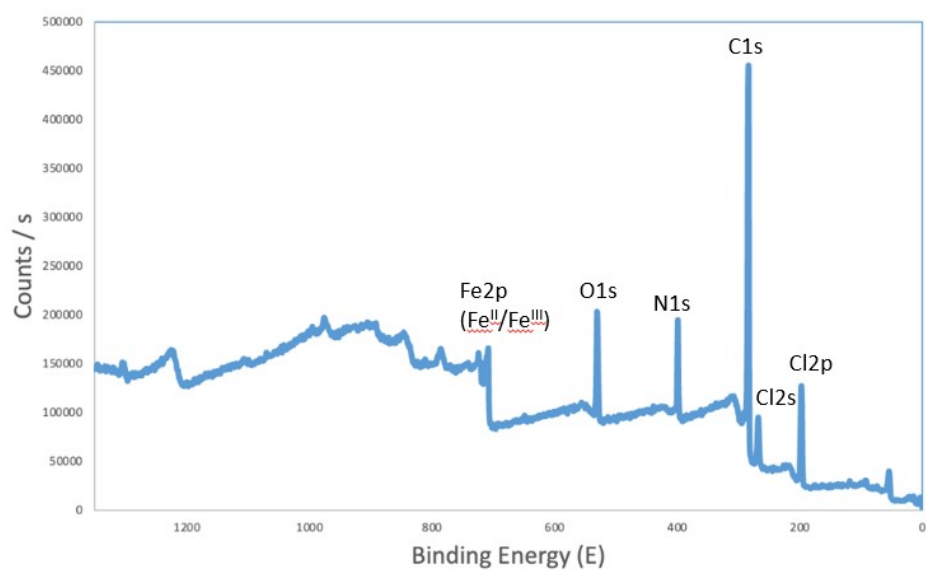

### After catalysis

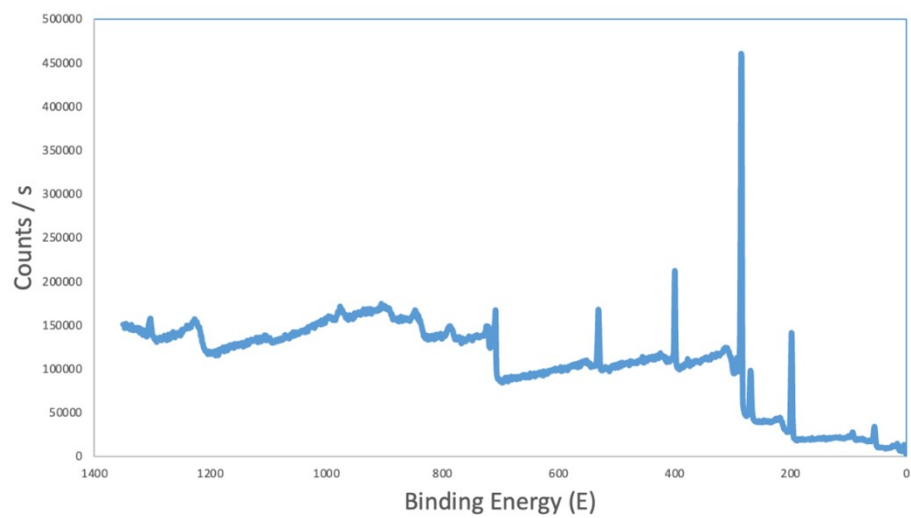

**Figure S2.** The XPS surveys of sample **1** before and after being used in catalysis.

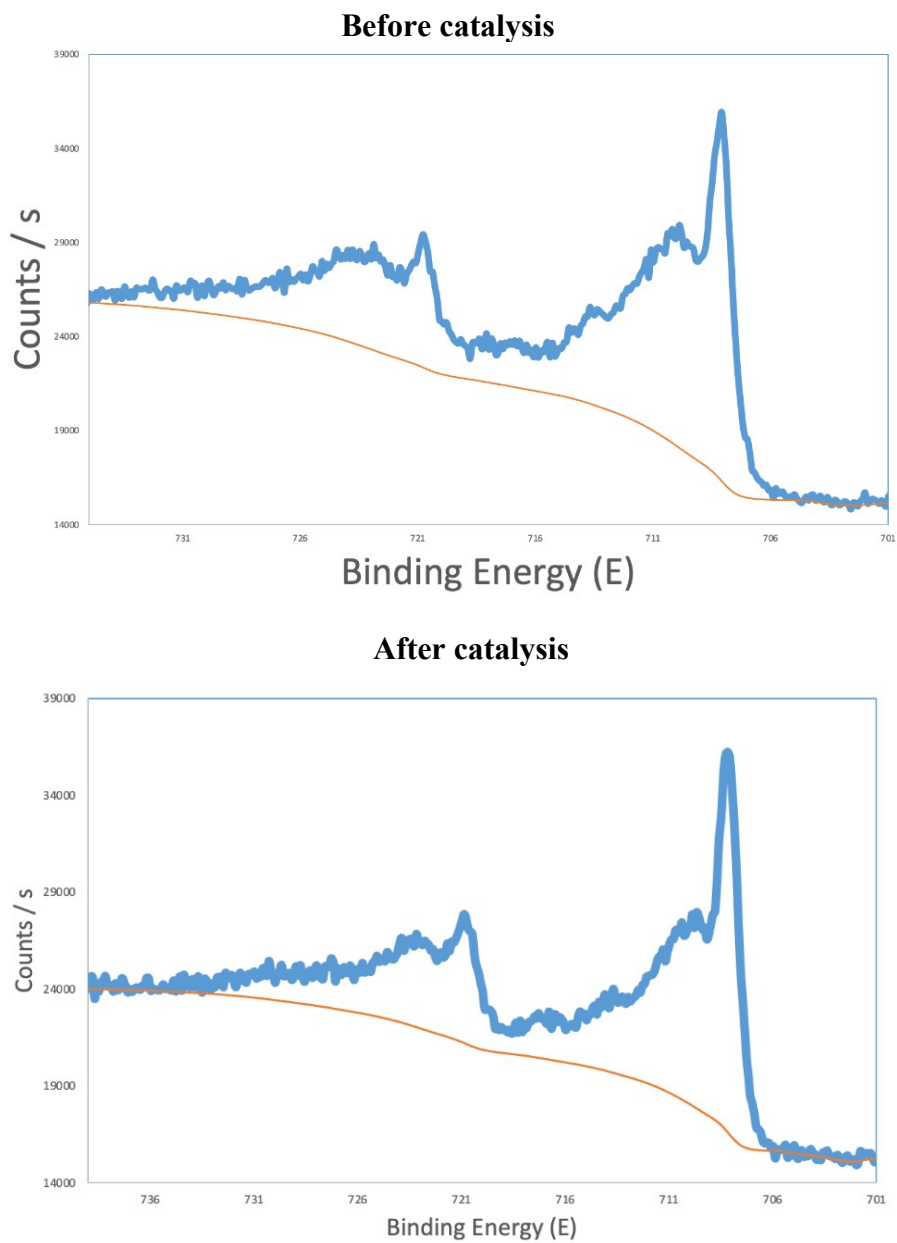

**Figure S3.** The XPS profiles of Fe2p in **1** before and after being used in catalysis. The presence of both Fe<sup>2+</sup> and Fe<sup>3+</sup> is in good agreement with known mixed-valent iron compounds in the literature.<sup>1</sup>

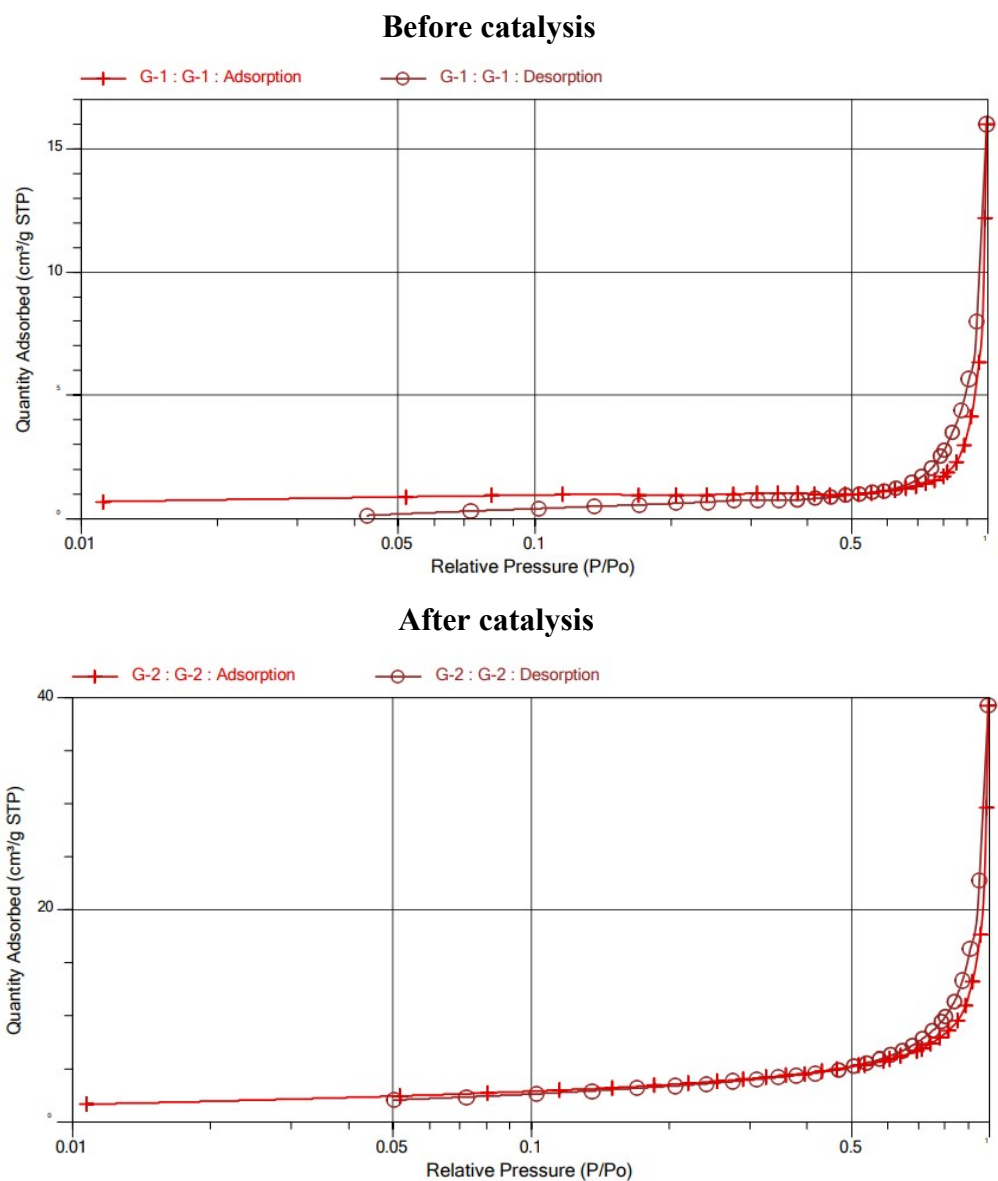

**Figure S4.** The N<sub>2</sub> absorption/desorption isotherms of **1** before and after being used in catalysis.

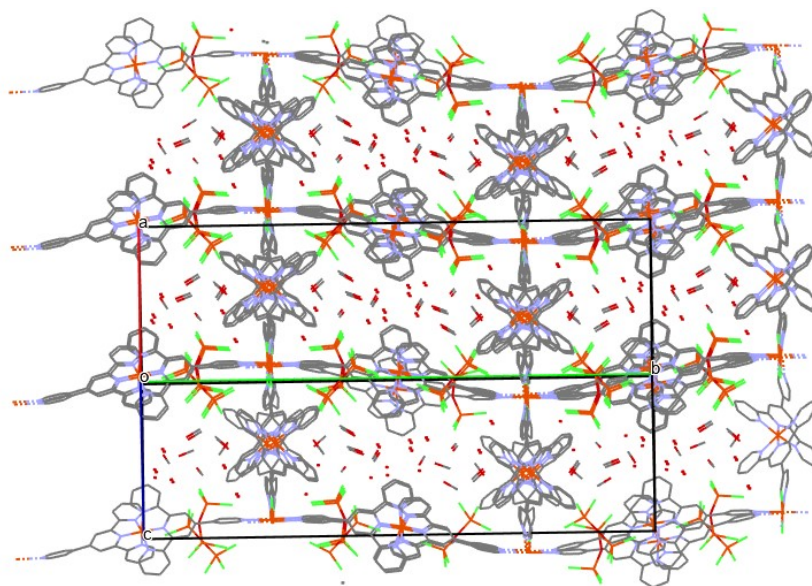

**Fig. S5.** The 3-D packing structure in **1** driven by  $\pi \cdots \pi$  stacking showing large pores that are partially occupied by the counterions  $\text{Cl}_3\text{FeOFeCl}_3$  and co-crystallised solvent molecules.

**Table S1.** Crystal, intensity collection, and refinement data.

|                                         | <b>1</b>                              | <b>2</b>                               |
|-----------------------------------------|---------------------------------------|----------------------------------------|
| lattice                                 | Monoclinic                            | Triclinic                              |
| formula                                 | $C_{86}H_{92}Cl_{14}Fe_7N_{16}O_{14}$ | $C_{43}H_{31.5}Cl_{9.5}Fe_4N_8O_{1.5}$ |
| formula weight                          | 2461.00                               | 1244.44                                |
| space group                             | $P2_1/n$                              | $P-1$                                  |
| $a/\text{\AA}$                          | 15.759(2)                             | 11.4061(12)                            |
| $b/\text{\AA}$                          | 44.011(6)                             | 14.7072(15)                            |
| $c/\text{\AA}$                          | 17.302(3)                             | 16.0129(17)                            |
| $\alpha/^\circ$                         | 90                                    | 101.764(2)                             |
| $\beta/^\circ$                          | 108.840(8)                            | 110.162(2)                             |
| $\gamma/^\circ$                         | 90                                    | 92.028(2)                              |
| $V/\text{\AA}^3$                        | 11357(3)                              | 2452.3(4)                              |
| $Z$                                     | 4                                     | 2                                      |
| temperature (K)                         | 130(2)                                | 130(2)                                 |
| radiation ( $\lambda$ , $\text{\AA}$ )  | 0.71073                               | 0.71073                                |
| $\rho$ (calcd.) $\text{g cm}^{-3}$      | 1.439                                 | 1.685                                  |
| $\mu$ (Mo $K\alpha$ ), $\text{mm}^{-1}$ | 1.259                                 | 1.723                                  |
| $\theta$ max, deg.                      | 25.027                                | 30.247                                 |
| no. of data collected                   | 201893                                | 69494                                  |
| no. of data                             | 20069                                 | 14450                                  |
| no. of parameters                       | 1245                                  | 619                                    |
| $R_I [I > 2\sigma(I)]$                  | 0.1335                                | 0.0706                                 |
| $wR_2 [I > 2\sigma(I)]$                 | 0.3060                                | 0.1662                                 |
| $R_I$ [all data]                        | 0.1533                                | 0.1451                                 |
| $wR_2$ [all data]                       | 0.3157                                | 0.2045                                 |
| GOF                                     | 1.152                                 | 1.026                                  |
| $R_{int}$                               | 0.1261                                | 0.1221                                 |

### Spectroscopic data for selective products

**3a:**<sup>2</sup> Colorless oil. Yield: 161 mg (70%). <sup>1</sup>H NMR (600 MHz, CDCl<sub>3</sub>) δ 7.52 (d, *J* = 7.7 Hz, 2H), 7.43 (d, *J* = 18.5 Hz, 1H), 7.36 (t, *J* = 7.5 Hz, 2H), 7.31 (t, *J* = 7.3 Hz, 1H), 6.20 (d, *J* = 18.5 Hz, 1H), 1.34 (s, 12H) ppm; <sup>13</sup>C NMR (126 MHz, CDCl<sub>3</sub>) δ 149.7, 137.7, 129.0, 128.7, 127.2, 83.5, 25.0 ppm. GC-MS (*m/z*): 230 (calc. 230).

**3c:**<sup>2</sup> Yellowish oil. Yield: 164 mg (66%). <sup>1</sup>H NMR (600 MHz, CDCl<sub>3</sub>) δ 7.52 (d, *J* = 7.7 Hz, 2H), 7.43 (d, *J* = 18.5 Hz, 1H), 7.36 (t, *J* = 7.5 Hz, 2H), 7.31 (t, *J* = 7.3 Hz, 1H), 6.20 (d, *J* = 18.5 Hz, 1H), 1.34 (s, 12H) ppm; <sup>13</sup>C NMR (151 MHz, CDCl<sub>3</sub>) δ 163.3 (d, *J* = 248.7 Hz), 148.3, 133.9, 128.8 (d, *J* = 8.2 Hz), 115.7 (d, *J* = 21.6 Hz), 83.5, 24.9 ppm. GC-MS (*m/z*): 248 (calc. 248).

**3h:**<sup>2</sup> Colorless oil. Yield: 155 mg (80%). <sup>1</sup>H NMR (600 MHz, CDCl<sub>3</sub>) δ 6.07 (dd, *J* = 17.8, 9.3 Hz, 1H), 5.48 (d, *J* = 17.8 Hz, 1H), 1.51 (dq, *J* = 8.7, 4.1 Hz, 1H), 1.29 – 1.17 (m, 12H), 0.79 (dd, *J* = 8.1, 2.4 Hz, 2H), 0.58 – 0.45 (m, 2H) ppm; <sup>13</sup>C NMR (126 MHz, CDCl<sub>3</sub>) δ 158.7, 83.1, 24.9, 17.1, 8.0 ppm. GC-MS (*m/z*): 194 (calc. 194).

**3k:**<sup>2</sup> Colorless oil. Yield: 160 mg (77%). <sup>1</sup>H NMR (600 MHz, CDCl<sub>3</sub>) δ 6.63 (dtd, *J* = 18.3, 9.4, 8.1, 5.1 Hz, 1H), 5.82 (dddd, *J* = 17.0, 10.2, 6.1, 3.0 Hz, 1H), 5.48 – 5.42 (m, 1H), 5.05 – 4.99 (m, 1H), 4.99 – 4.94 (m, 1H), 2.25 (dd, *J* = 10.0, 4.4 Hz, 2H), 2.17 (dd, *J* = 8.7, 5.1 Hz, 2H), 1.28 – 1.24 (m, 12H) ppm; <sup>13</sup>C NMR (151 MHz, CDCl<sub>3</sub>) δ 153.5, 138.0, 114.8, 83.0, 35.1, 32.3, 29.7, 24.8 ppm. GC-MS (*m/z*): 208 (calc. 208).

**3l:**<sup>2</sup> Colorless oil. Yield: 159 mg (71%). <sup>1</sup>H NMR (600 MHz, CDCl<sub>3</sub>) δ 6.64 (dt, *J* = 18.1, 4.7 Hz, 1H), 5.90 (dq, *J* = 16.2, 5.3 Hz, 1H), 5.71 (dt, *J* = 18.2, 1.9 Hz, 1H), 5.37 – 5.22 (m, 1H), 5.22 – 5.06 (m, 1H), 4.06 (dd, *J* = 4.7, 1.8 Hz, 2H), 3.99 (d, *J* = 5.8 Hz, 2H), 1.26 (s, 12H) ppm; <sup>13</sup>C NMR (151 MHz, CDCl<sub>3</sub>) δ 149.2, 134.7, 116.9, 83.3, 71.7, 71.3, 24.8 ppm. GC-MS (*m/z*): 224 (calc. 224).



Copies of  $^1\text{H}$  and  $^{13}\text{C}$  NMR spectra for isolated products.

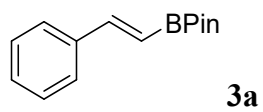

$^1\text{H}$  NMR spectrum:

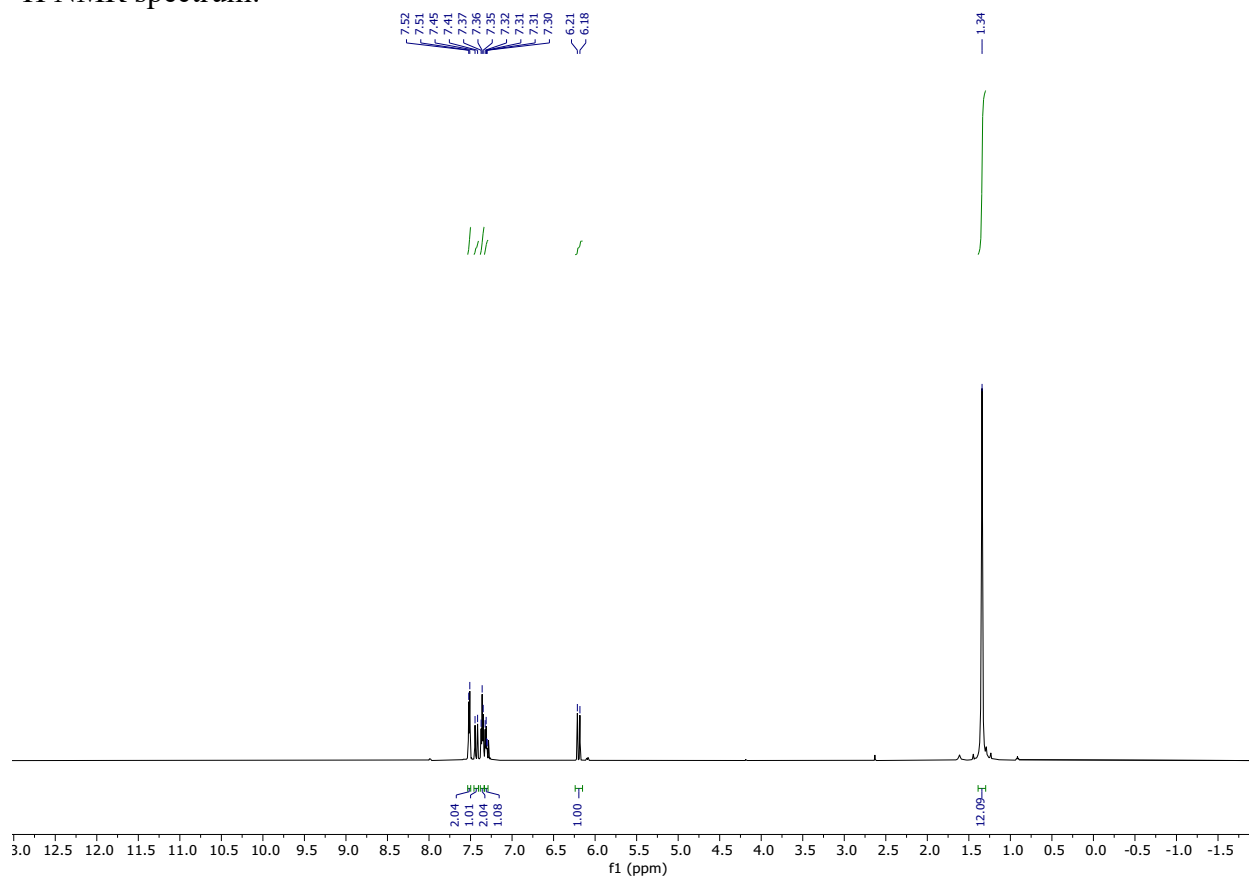

<sup>13</sup>C NMR spectrum:

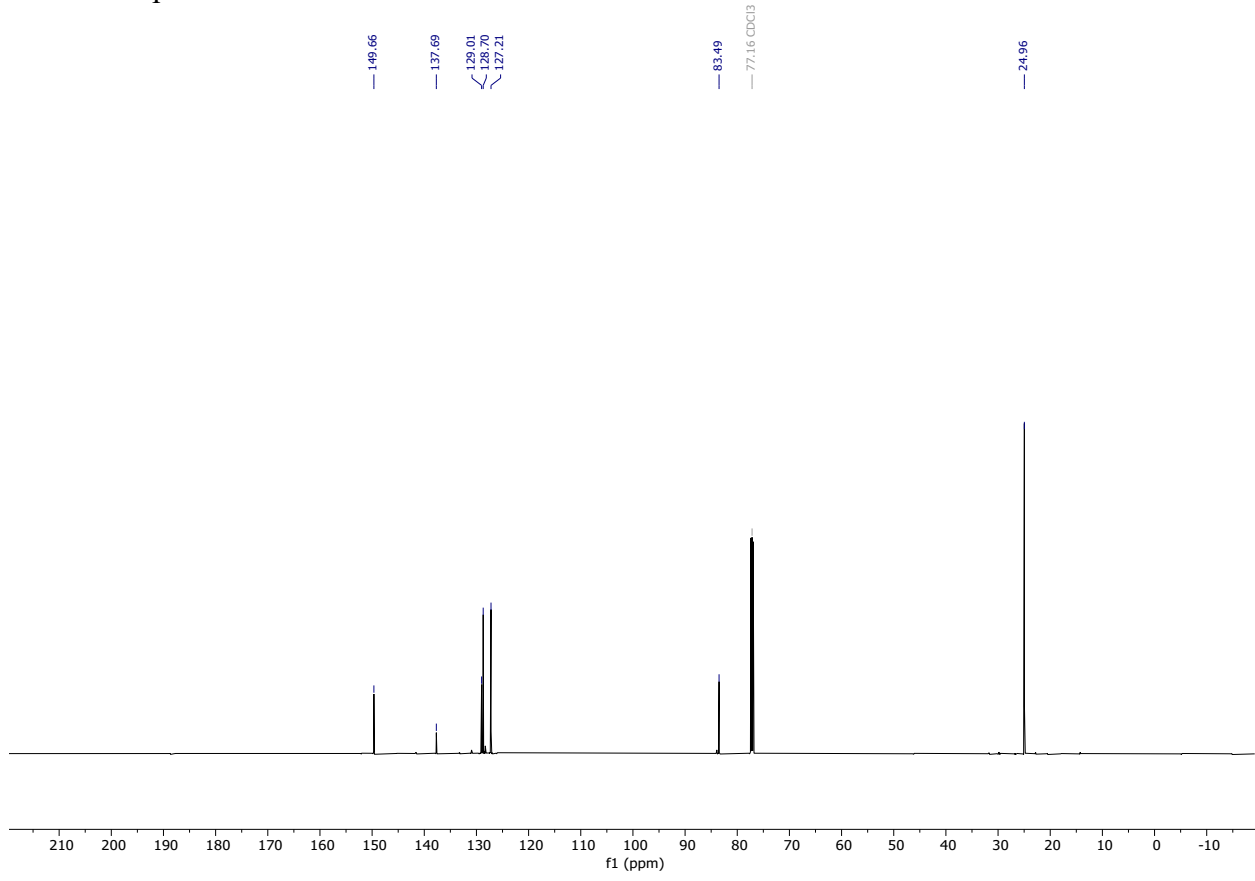

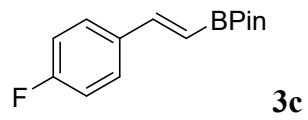

$^1\text{H}$  NMR spectrum:

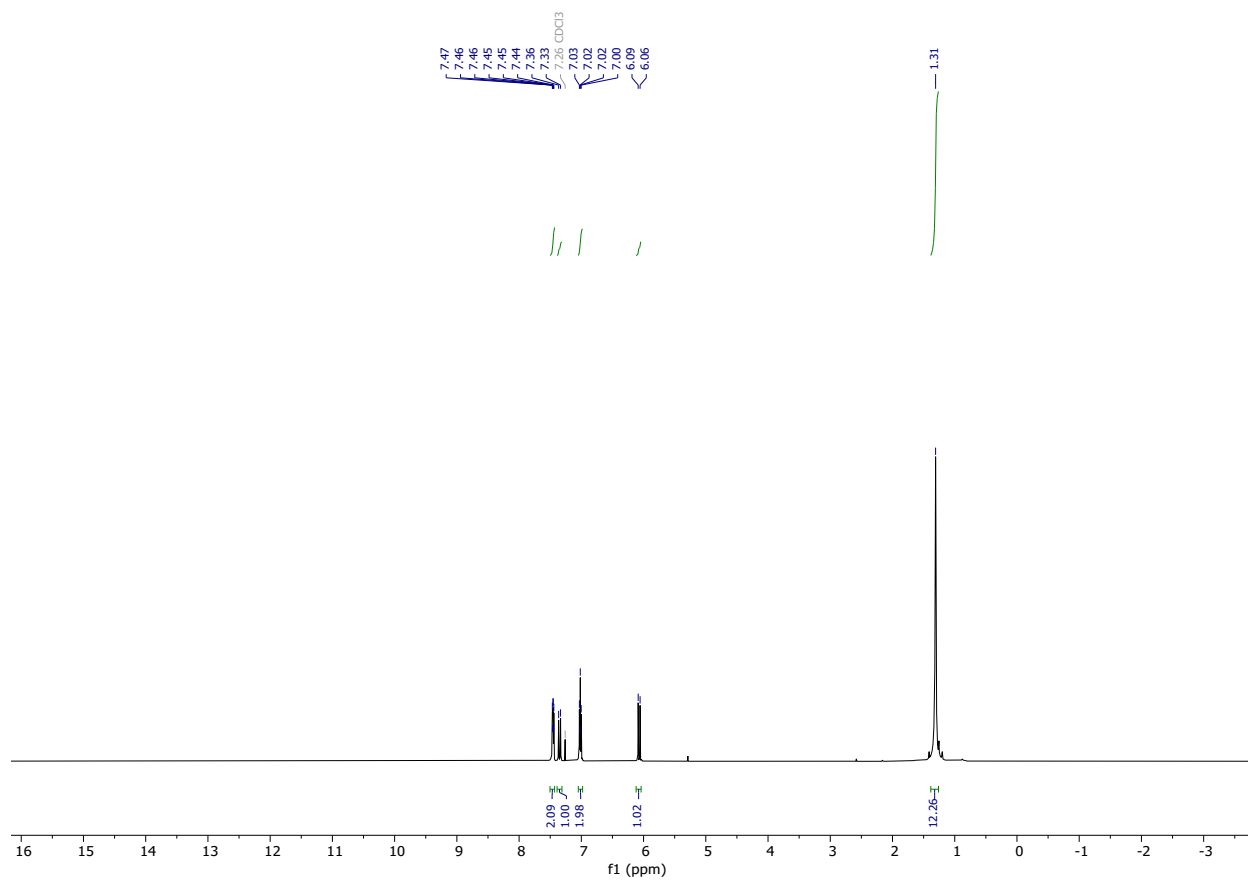

<sup>13</sup>C NMR spectrum:

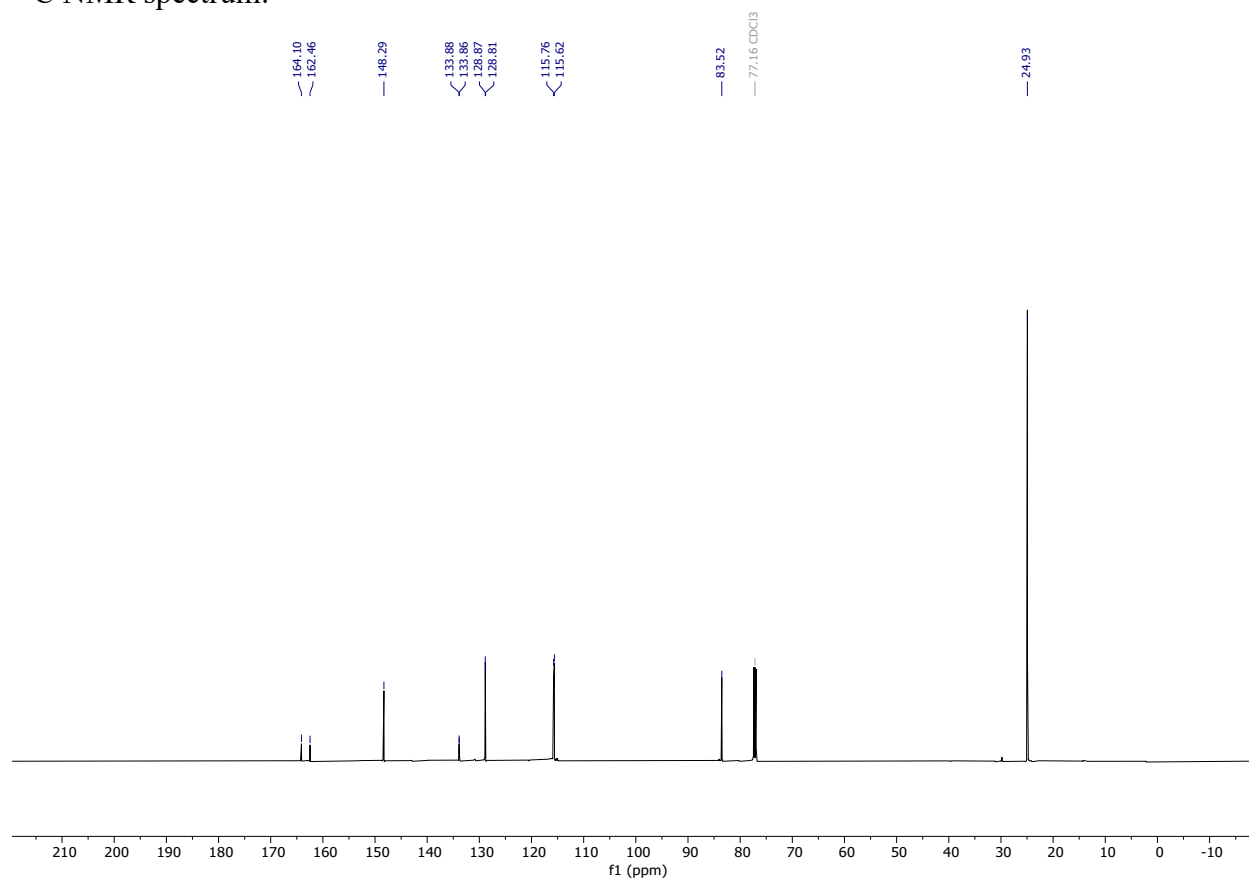

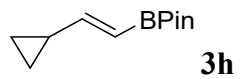

$^1\text{H}$  NMR spectrum:

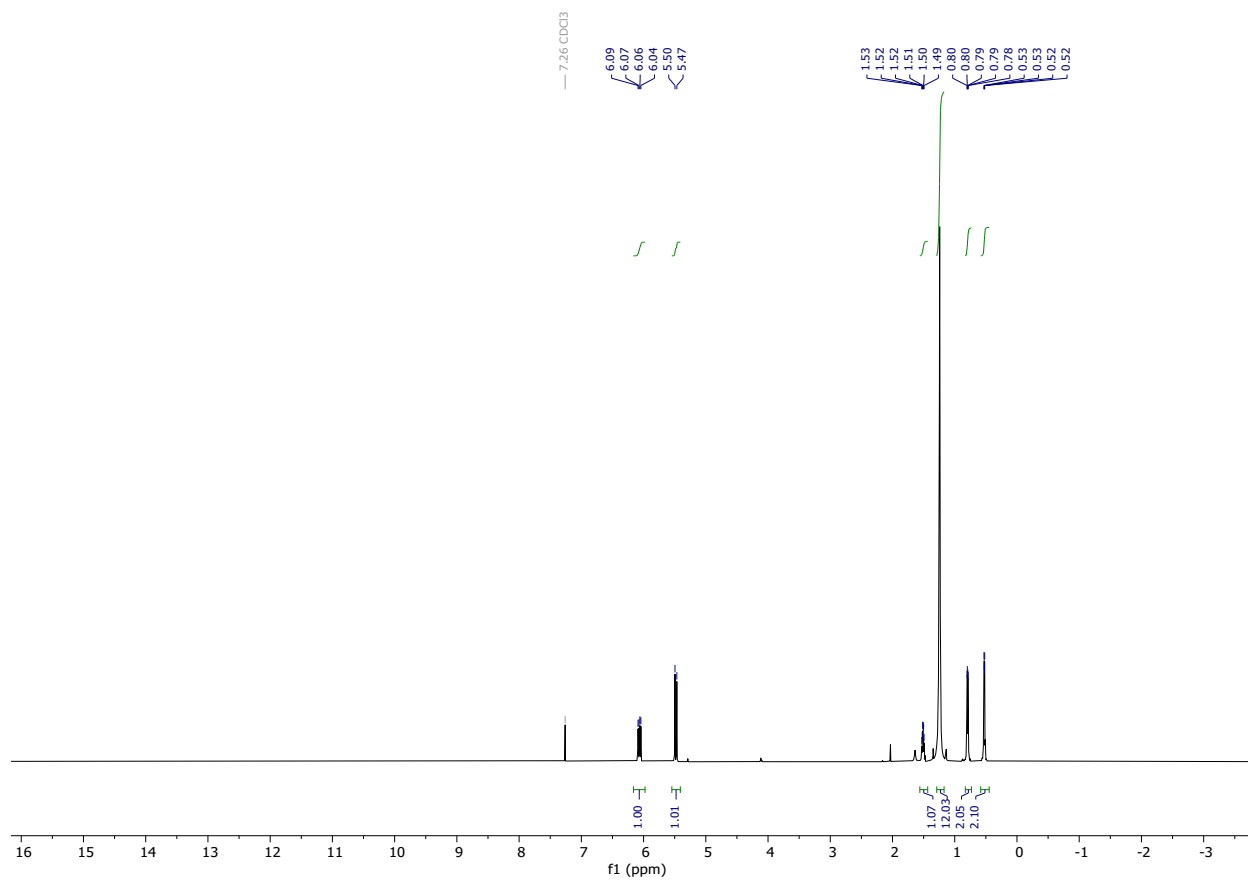

<sup>13</sup>C NMR spectrum:

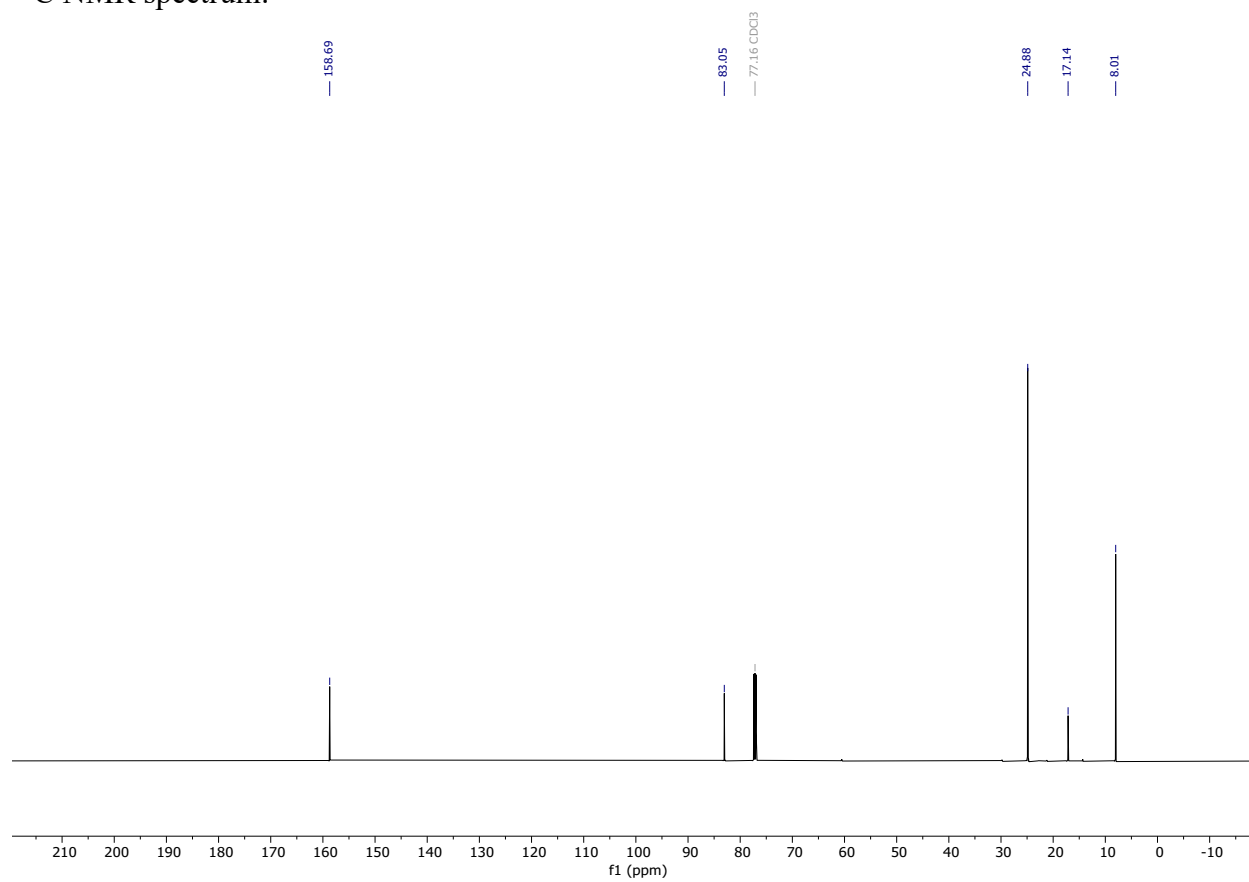

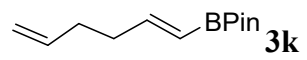

<sup>1</sup>H NMR spectrum:

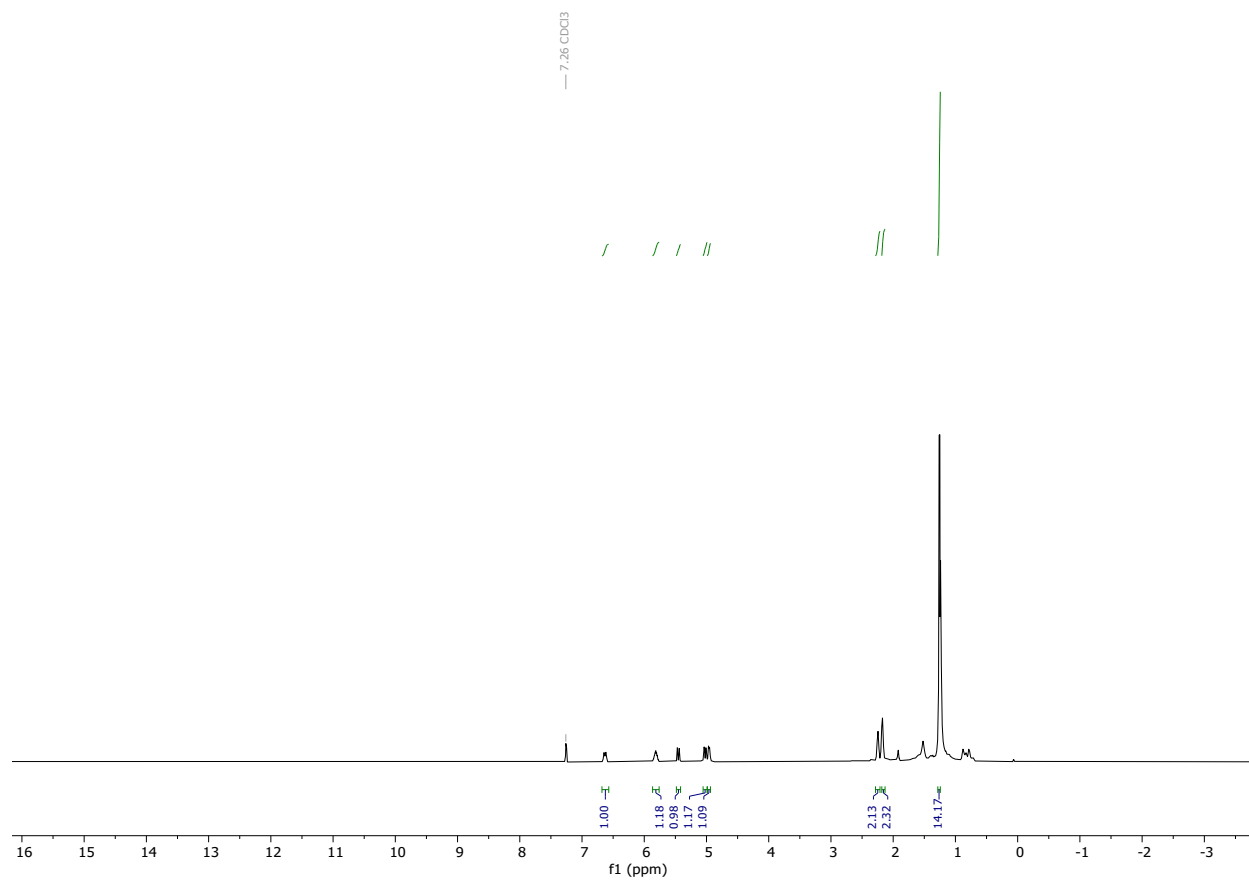

$^{13}\text{C}$  NMR spectrum:

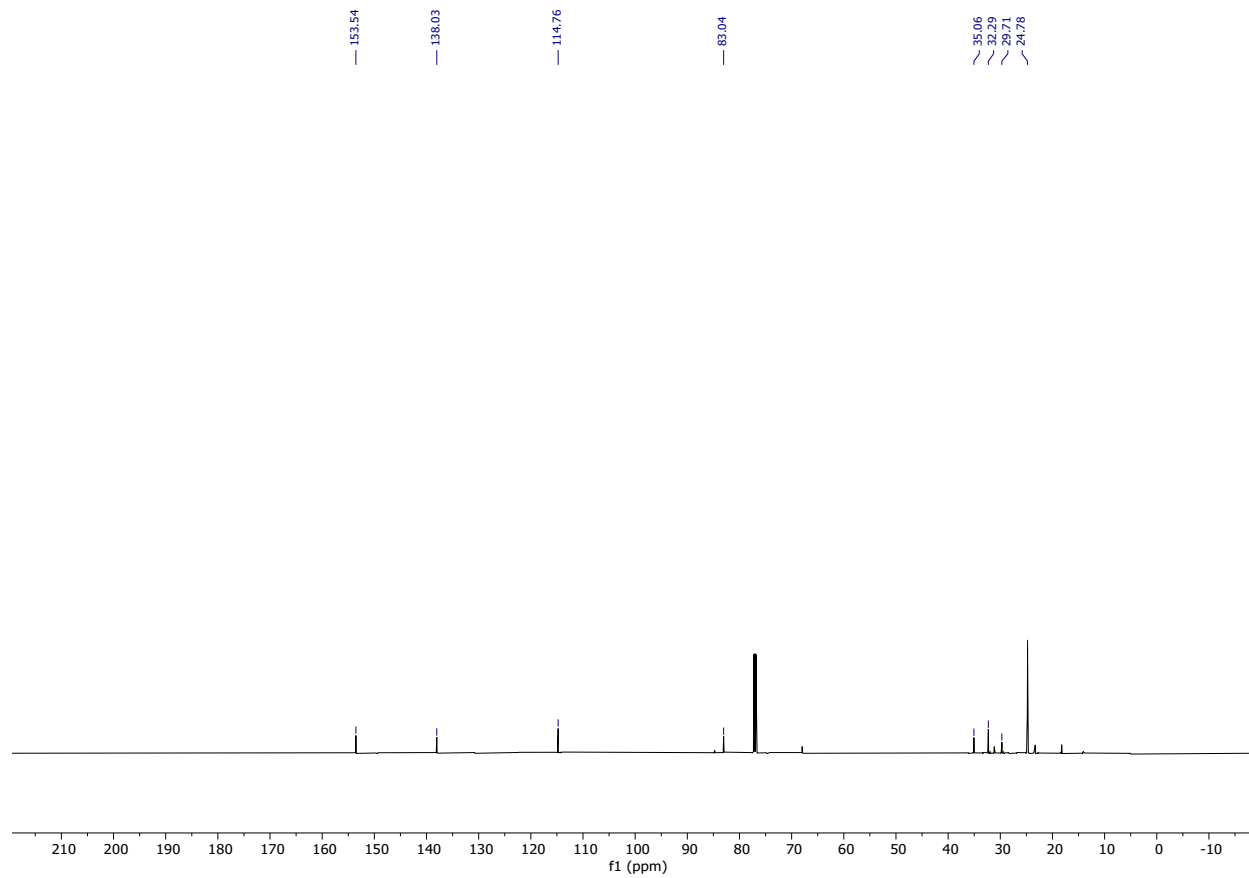



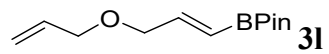

$^1\text{H}$  NMR spectrum:

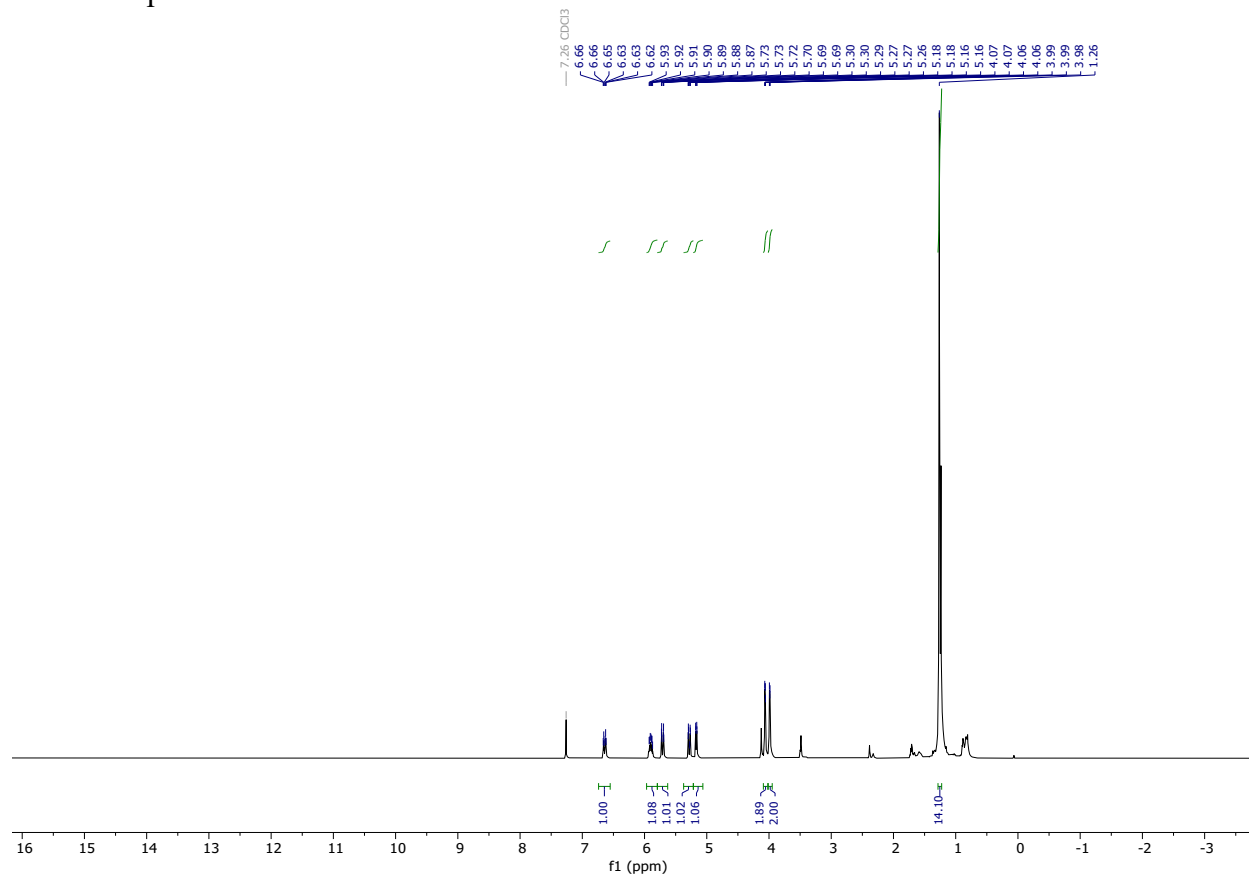

$^{13}\text{C}$  NMR spectrum:

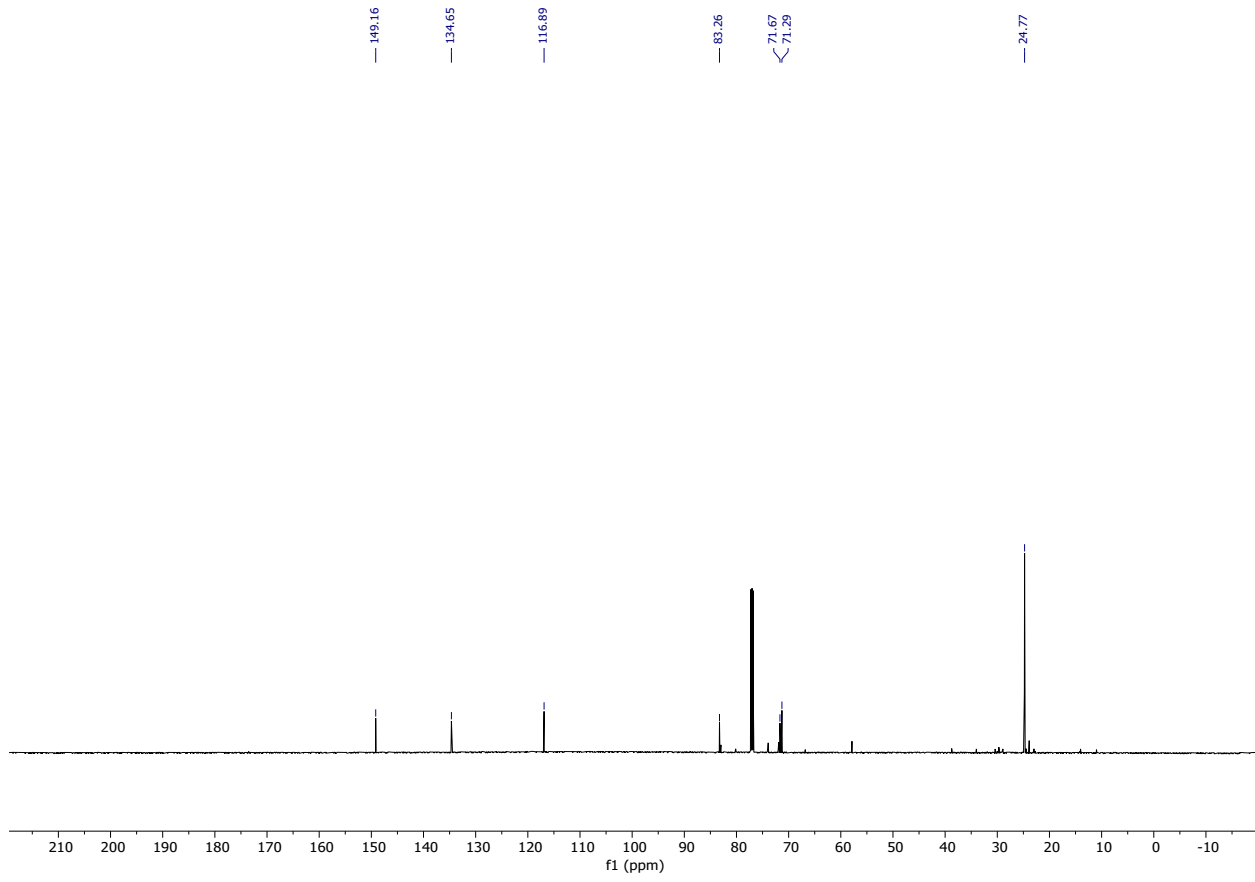

**References:**

1. M. Mullet, V. Khare and C. Ruby, *Surf. Interface Anal.* 2008, **40**, 323–328.
2. G. Zhang, H. Zeng; S. Zheng, M.C. Neary and P.A. Dub, *ACS Catal.* 2022, **12**, 5425-5429.
